# Supplementary material for: Prevalence and Appropriateness of Indwelling Urinary Catheters in Japanese Hospital Wards: A Multicenter Point Prevalence Study
Source: Research Square preprint supplement (doi:10.21203/rs.3.rs-970770/v1), 2021-11-02
Supplement: Supplementary file 1 [file fd3574df1e816a51970bf207.docx]

**Supplementary Appendix Table: Participating Hospital Characteristics**

| **Hospital** | **Hospital Type** | **Hospital Beds** | **Ward type** | **Ward Beds** |
| --- | --- | --- | --- | --- |
| Hospital A | University-affiliated, Community | 389 | Respiratory Medicine, Neurology, Otolaryngology | 46 |
| Hospital B | Public | 789 | Gastroenterology, Gastroenterological Surgery | 44 |
| Hospital C - Unit 1 | Public | 482 | Internal Medicine | 41 |
| Hospital C - Unit 2 | Public | 482 | Internal Medicine | 44 |
| Hospital D | Private | 658 | Internal Medicine, Surgery, Urology, Orthopedics, Gynecology | 45 |
| Hospital E | Private | 386 | Internal Medicine, Orthopedics | 47 |
| Hospital F | Private | 60 | Internal Medicine, Orthopedics | 60 |
